# Supplementary material for: The Cerebellum Is a Common Key for Visuospatial Execution and Attention in Parkinson’s Disease
Source: MDPI journal article supplement (doi:10.3390/diagnostics11061042), 2021-06-06
Supplement: s1 [file s1]

Supplementary TABLES

Supplementary Table 1. Summary of the independent components.

| Network | Number of IC | Region | BA/Lobule | MNI coordinates (mm) |     |     |
|---------|--------------|--------|-----------|----------------------|-----|-----|
|         |              |        |           | x                    | y   | z   |
| DMN     | 4            | AC     | 32        | 0                    | 28  | −12 |
|         | 6            | PC     | 23        | 0                    | −56 | 22  |
|         | 8            | AC     | 24        | 0                    | 26  | 18  |
|         | 10           | Prc    | 7         | 0                    | −66 | 54  |
|         | 12           | Prc    | 7         | −2                   | −78 | 40  |
|         | 15           | MeFG   | 11        | 0                    | 50  | −8  |
|         | 17           | MeFG   | 8         | 0                    | 48  | 46  |

|     |    |       |    |     |     |     |
|-----|----|-------|----|-----|-----|-----|
|     | 18 | MeFG  | 10 | 0   | 64  | 10  |
|     | 25 | SFG   | 8  | 6   | 36  | 52  |
|     | 60 | AC    | 24 | 2   | 32  | -6  |
|     | 67 | SFG   | 6  | -4  | 12  | 58  |
| CCN | 11 | STG   | 38 | -36 | 10  | -28 |
|     | 20 | ITG   | 21 | -62 | -4  | -22 |
|     | 22 | STG   | 38 | 36  | 12  | -28 |
|     | 24 | Uncus | 20 | 34  | 2   | -40 |
|     | 28 | IPL   | 40 | -48 | -36 | 38  |
|     | 31 | MTG   | 21 | -66 | -30 | -18 |
|     | 34 | IPL   | 40 | 46  | -56 | 50  |

---

---

|    |      |    |     |     |     |
|----|------|----|-----|-----|-----|
| 37 | MiFG | 10 | 22  | 64  | 24  |
| 38 | IFG  | 46 | 50  | 48  | 6   |
| 39 | STG  | 22 | 62  | -52 | 10  |
| 43 | MiFG | 8  | 30  | 32  | 46  |
| 44 | STG  | 38 | -42 | 2   | -20 |
| 45 | IPL  | 40 | 66  | -34 | 28  |
| 48 | MiFG | 46 | 56  | 24  | 28  |
| 49 | MiFG | 10 | -30 | 60  | 6   |
| 50 | STG  | 38 | -44 | 14  | -10 |
| 51 | MiFG | 10 | -34 | 60  | 16  |
| 56 | SFG  | 8  | -18 | 46  | 42  |

---

|     |    |      |    |     |     |     |
|-----|----|------|----|-----|-----|-----|
|     | 57 | MTG  | 21 | 68  | -32 | -14 |
|     | 59 | MFG  | 10 | -44 | 52  | 0   |
|     | 61 | MFG  | 10 | 34  | 64  | -8  |
|     | 64 | IPL  | 40 | -50 | -64 | 48  |
|     | 66 | IFG  | 46 | -54 | 30  | 48  |
|     | 71 | STG  | 38 | 44  | 8   | -20 |
| SMN | 1  | PrG  | 4  | 62  | -4  | 24  |
|     | 5  | SPL  | 7  | -18 | -60 | 68  |
|     | 7  | PoG  | 3  | 42  | -26 | 64  |
|     | 9  | PrG  | 4  | -40 | -24 | 66  |
|     | 35 | MeFG | 6  | 8   | 0   | 64  |

|     |    |            |               |     |     |     |
|-----|----|------------|---------------|-----|-----|-----|
|     | 40 | MeFG       | 6             | 2   | −10 | 54  |
|     | 42 | MeFG       | 6             | −2  | −30 | 70  |
| VIS | 14 | Cuneus     | 30            | −12 | −60 | 8   |
|     | 30 | Cuneus     | 19            | −28 | −86 | 34  |
|     | 46 | LG         | 17            | 10  | −98 | −4  |
|     | 54 | ITG        | 37            | 54  | −72 | −4  |
|     | 62 | MTG        | 19            | −56 | −66 | 16  |
|     | 63 | Cuneus     | 18            | 4   | −82 | 16  |
| AUD | 23 | STG        | 42            | −60 | −26 | 8   |
| CBN | 36 | Cerebellum | VII           | −30 | −84 | −46 |
|     | 47 | Cerebellum | VI, VII, VIII | −50 | −66 | −24 |

|     |    |            |         |     |     |     |
|-----|----|------------|---------|-----|-----|-----|
|     | 65 | Cerebellum | VI, VII | −34 | −86 | −26 |
| SCN | 3  | CN         | NA      | −6  | 12  | −2  |
|     | 33 | Putamen    | NA      | −24 | 2   | −8  |

Abbreviations: AC, anterior cingulate; AG, angular gyrus; AUD, auditory network; BA, Brodmann area; CBN, cerebellar network;

CCN, cognitive control network; CI, confidence interval; CN, caudate nucleus; DMN, default mode network; HY, Hoehn-Yahr stage;

IFG, inferior frontal gyrus; IPL, inferior parietal lobule; ITG, inferior temporal gyrus; LED, levodopa equivalent dose; LG, lingual

gyrus; MeFG, medial frontal gyrus; MiFG, middle frontal gyrus; MTG, middle temporal gyrus; NA, not available; PC, posterior

cingulate; PoG, postcentral gyrus; Prc, precuneus; PrG, precentral gyrus; SCN, sub-cortical network; SFG, superior frontal gyrus; SMN,

somatomotor network; SPL, superior parietal lobule; STG, superior temporal gyrus; VIS, visual network.
