# Supplementary material for: The Cerebellum Is a Common Key for Visuospatial Execution and Attention in Parkinson’s Disease
Source: MDPI journal article supplement (doi:10.3390/diagnostics11061042), 2021-06-06
Supplement: s1 [file s1]

## Supplementary Figure Legend

Supplementary Figure 1. Group differences in network scores.

Network scores in the PD group were significantly reduced in the anterior cingulate

(IC4,  $p = 0.02$ ), cerebellar lobule VII (IC36,  $p = 0.04$ ) or superior temporal gyrus (IC50,

$p < 0.05$ ) compared with the Ctr group. In contrast, network scores in the PD group

were significantly increased in cerebellar lobule VI (IC47,  $p = 0.04$ ) or the inferior

frontal gyrus (IC66,  $p = 0.04$ ) compared with the Ctr group. AC, anterior cingulate; CB,

cerebellum; CBN, cerebellar network; CCN, cognitive control network; Ctr, normal

control; DMN, default mode network; IFG, inferior frontal gyrus; Lt, left; PD,

Parkinson's disease; Rt, right; STG, superior temporal gyrus.
